# Supplementary material
Source: MDPI journal article supplement (https://www.mdpi.com/2218-0532/89/3/39)
Supplement: s1 [file s1]

# The Effect of Wheatgrass Lyophilizate on Blood Clotting Time in Rats

István Takács <sup>1</sup>, Melinda Urkon <sup>1,2</sup>, Tivadar Kiss <sup>1,3</sup>, Edina Horváth <sup>4</sup>, Eszter Laczkó-Zöld <sup>2</sup>, Zoltán Péter Zomborszki <sup>1,3</sup>, Anita Lukács <sup>3,4,5</sup>, Gábor Oszlanczi <sup>3,4</sup>, Dezső Csupor <sup>1,3,6,\*</sup> and Andrea Szabó <sup>3,4</sup>

- <sup>1</sup> Department of Pharmacognosy, Faculty of Pharmacy, University of Szeged, 6 Eötvös street, H-6720 Szeged, Hungary; taki.biotech@gmail.com (I.T.); urkonmelinda1@gmail.com (M.U.); kiss.tivadar@pharmacognosy.hu (T.K.); zombozope@pharmacognosy.hu (Z.P.Z.)
  - <sup>2</sup> Department of Pharmacognosy and Phytotherapy, George Emil Palade University of Medicine, Pharmacy, Science, and Technology of Târgu Mureş, Gheorghe Marinescu street 38, 540139 Târgu Mureş, Romania; zoldeszter@yahoo.com
  - <sup>3</sup> Interdisciplinary Centre for Natural Products, University of Szeged, 6 Eötvös street, H-6720 Szeged, Hungary; lukacs.anita@med.u-szeged.hu (A.L.); oszlanczi.gabor@gmail.com (G.O.); szabo.andrea@med.u-szeged.hu (A.S.)
  - <sup>4</sup> Department of Public Health, Faculty of Medicine, University of Szeged, H-6720 Szeged, Hungary; korosine.edina@med.u-szeged.hu (E.H.)
  - <sup>5</sup> Department of Physiology, Anatomy and Neuroscience, Faculty of Science and Informatics, University of Szeged, Közép fasor 52, H-6726 Szeged, Hungary
  - <sup>6</sup> Department of Clinical Pharmacy, Faculty of Pharmacy, University of Szeged, Szikra street 8, H-6725 Szeged, Hungary
- \* Correspondence: csupor.dezso@pharmacognosy.hu; Tel.: +36-62-54-5559

## Supplemental material content:

**Supplementary Table S1.** Freeze-drying process

**Supplementary Table S2.** Database of prothrombin time before and after treatment used for statistical analysis.

**Supplementary Table S3–S7.** Weight of animals, amount of administered warfarin and wheatgrass on 1–5 day of treatment.

**Supplementary Figure S1.** HPLC chromatogram of reference compounds ( $\lambda=350$  nm)

**Supplementary Figure S2.** HPLC chromatogram of fraction eluted with 40% of methanol and apigenin ( $\lambda=350$  nm)

**Supplementary Figure S2.** Calibration curve (apigenin).

**Table S1.** Freeze-drying process.

| Process          | Temperature (°C) | Interval (hours) | Pressure (Mbar) |
|------------------|------------------|------------------|-----------------|
| Sublimation      | −54              | 5.0              | 0.15            |
|                  | −40              | 2.5              | 0.15            |
|                  | −30              | 2.0              | 0.25            |
|                  | −10              | 2.0              | 0.30            |
| Drying           | −5               | 5.0              | 0.30            |
|                  | +10              | 4.0              | 0.40            |
| Secondary drying | +30              | 5.0              | 0.50            |

**Table 2.** Database of prothrombin times before and after treatment used for statistical analysis.

| Group | Animal # | mechanical<br>coagulometer |       | optical coagulometer |       |
|-------|----------|----------------------------|-------|----------------------|-------|
|       |          | before                     | after | before               | after |
| WG    | 1        | 17.4                       | 16.7  | 20.9                 | 18.3  |
| WG    | 1        | 17.3                       | 16.7  | 21.3                 | 18.1  |
| WG    | 1        | 17.5                       | 16.8  | -                    | -     |
| WG    | 2        | 15.3                       | 16.4  | 20.7                 | 18.3  |
| WG    | 2        | 15.2                       | 17    | 20.7                 | 18.5  |
| WG    | 2        | 15.4                       | 17    | 19.7                 | 18.7  |
| WG    | 3        | 15                         | 17.9  | 18.3                 | 18.3  |
| WG    | 3        | 15                         | 17.1  | 18.1                 | 17.9  |
| WG    | 3        | 15                         | 17.2  | -                    | -     |
| WG    | 4        | 16                         | 20.3  | 18                   | 19.7  |
| WG    | 4        | 16                         | 18.7  | 17.7                 | 19.9  |
| WG    | 4        | 15.9                       | 18.5  | -                    | -     |
| WG    | 5        | 16.4                       | 18    | 18.7                 | 17.9  |
| WG    | 5        | 16.4                       | 17    | 18.5                 | 17.9  |
| WG    | 5        | 16.4                       | 17.1  | -                    | -     |
| WG    | 6        | 17                         | 20    | 18.9                 | 20.3  |
| WG    | 6        | 16.9                       | 18.8  | 18.9                 | 20.3  |
| WG    | 6        | 17.1                       | 18.4  | -                    | -     |
| WG    | 7        | 17                         | 18.1  | -                    | -     |
| WG    | 7        | 16.9                       | 16.1  | -                    | -     |
| WG    | 7        | 17.1                       | 15.1  | -                    | -     |
| WG    | 8        | 17.6                       | 20.7  | 19.8                 | 20.5  |
| WG    | 8        | 17.7                       | 19.5  | 24.9                 | 20.2  |
| WG    | 8        | 17.5                       | 19.2  | -                    | -     |
| WF    | 9        | 16.5                       | 40    | 17.7                 | 40.1  |
| WF    | 9        | 16.5                       | 36.2  | 17.5                 | 30.1  |
| WF    | 9        | 16.5                       | 37.8  | -                    | -     |
| WF    | 10       | 17.2                       | 35.5  | 18.3                 | 35.7  |
| WF    | 10       | 17.3                       | 33.1  | 18.3                 | 35.9  |
| WF    | 10       | 17.1                       | 30    | -                    | -     |
| WF    | 11       | 18.1                       | 39.9  | 19.3                 | 40.7  |
| WF    | 11       | 18.2                       | 36.1  | 19.7                 | 40.1  |
| WF    | 11       | 18                         | 35.9  | -                    | -     |
| WF    | 12       | 17.1                       | 39.5  | 17.7                 | 38.8  |
| WF    | 12       | 17.1                       | 40.5  | 18.1                 | 38.3  |
| WF    | 12       | 17.1                       | 35.5  | 18.1                 | 41.7  |
| WF    | 14       | 18.3                       | 41.2  | 18.9                 | 39.5  |
| WF    | 14       | 18.4                       | 39.3  | 18.7                 | 40.7  |
| WF    | 14       | -                          | -     | -                    | -     |
| WF    | 16       | 17.5                       | 35.9  | 18.9                 | 34.7  |
| WF    | 16       | 17.6                       | 35.1  | 18.3                 | 34.9  |
| WF    | 16       | 17.4                       | 35.3  | -                    | -     |
| WF    | 17       | 19.2                       | 26.4  | -                    | -     |
| WF    | 17       | 19.2                       | 26.4  | -                    | -     |
| WF    | 17       | -                          | -     | -                    | -     |
| WW    | 18       | 17.6                       | 46.7  | 18.7                 | 46.1  |
| WW    | 18       | 17.7                       | 36.8  | 18.7                 | 47.3  |
| WW    | 18       | 17.5                       | 39.3  | -                    | -     |

|    |    |      |      |      |      |
|----|----|------|------|------|------|
| WW | 19 | 18   | 34.7 | 18.7 | 35.5 |
| WW | 19 | 18.1 | 32.1 | 18.7 | 35.5 |
| WW | 19 | 17.9 | 32.1 | -    | -    |
| WW | 22 | 17.2 | 50.8 | 17.9 | 50.1 |
| WW | 22 | 17.2 | 45.9 | 17.9 | 50.3 |
| WW | 22 | 17.2 | 46.7 | -    | -    |
| WW | 23 | 16.3 | 43.5 | 16.9 | 44.7 |
| WW | 23 | 16.2 | 39.8 | 16.7 | 43.7 |
| WW | 23 | 16.1 | 39.5 | -    | -    |
| WW | 24 | 17.3 | 49.1 | 18.3 | 47.9 |
| WW | 24 | 17.3 | 44   | 17.9 | 48.7 |
| WW | 24 | 17.3 | 44   | -    | -    |

WG: wheatgrass; WF: warfarin; WW: wheatgrass+warfarin; -: determination of prothrombin time failed

Table S3. 1<sup>st</sup> day of treatment

| Group | Animal | Weight of the animal (g) | Ammount of warfarin (mg) | Ammount of tablet (mg) | Ammount of wheatgrass (mg) |
|-------|--------|--------------------------|--------------------------|------------------------|----------------------------|
| WG    | 1.     | 245                      |                          |                        | 31.24                      |
|       | 2.     | 244                      |                          |                        | 31.11                      |
|       | 3.     | 240                      |                          |                        | 30.60                      |
|       | 4.     | 257                      |                          |                        | 32.77                      |
|       | 5.     | 247                      |                          |                        | 31.49                      |
|       | 6.     | 244                      |                          |                        | 31.11                      |
|       | 7.     | 254                      |                          |                        | 32.39                      |
|       | 8.     | 237                      |                          |                        | 30.22                      |
| WF    | 9.     | 261                      | 0.1044                   | 4.78                   |                            |
|       | 10.    | 262                      | 0.1048                   | 4.80                   |                            |
|       | 11.    | 250                      | 0.1000                   | 4.58                   |                            |
|       | 12.    | 259                      | 0.1036                   | 4.75                   |                            |
|       | 13.    | 247                      | 0.0988                   | 4.53                   |                            |
|       | 14.    | 240                      | 0.0960                   | 4.40                   |                            |
|       | 15.    | 231                      | 0.0924                   | 4.23                   |                            |
|       | 16.    | 238                      | 0.0952                   | 4.36                   |                            |
| WW    | 17.    | 252                      | 0.1008                   | 4.62                   | 32.13                      |
|       | 18.    | 232                      | 0.0928                   | 4.25                   | 29.58                      |
|       | 19.    | 247                      | 0.0988                   | 4.53                   | 31.49                      |
|       | 20.    | 233                      | 0.0932                   | 4.27                   | 29.71                      |
|       | 21.    | 251                      | 0.1004                   | 4.60                   | 32.00                      |
|       | 22.    | 252                      | 0.1008                   | 4.62                   | 32.13                      |
|       | 23.    | 271                      | 0.1084                   | 4.97                   | 34.55                      |
|       | 24.    | 275                      | 0.1100                   | 5.04                   | 35.06                      |

**Further notes:**

Weight of warfarin: 137.42 mg

**Observations:**

The animal No 17. is eating slow.

The doughs had to be put in the paws for several times in case of animal No 23. and 24., but finally the feeding was successful.

The WW group received warfarin and wheatgrass in the same dough.

**Table S4.** 2<sup>nd</sup> day of treatment

| Group | Animal | Weight of the animal (g) | Ammount of warfarin (mg) | Ammount of tablet (mg) | Ammount of wheatgrass (mg) |
|-------|--------|--------------------------|--------------------------|------------------------|----------------------------|
| WG    | 1.     | 249                      |                          |                        | 31.75                      |
|       | 2.     | 248                      |                          |                        | 31.62                      |
|       | 3.     | 244                      |                          |                        | 31.11                      |
|       | 4.     | 260                      |                          |                        | 33.15                      |
|       | 5.     | 249                      |                          |                        | 31.75                      |
|       | 6.     | 248                      |                          |                        | 31.62                      |
|       | 7.     | 256                      |                          |                        | 32.64                      |
|       | 8.     | 240                      |                          |                        | 30.60                      |
| WF    | 9.     | 264                      | 0.1056                   | 4.82                   |                            |
|       | 10.    | 264                      | 0.1056                   | 4.82                   |                            |
|       | 11.    | 251                      | 0.1004                   | 4.59                   |                            |
|       | 12.    | 260                      | 0.1040                   | 4.75                   |                            |
|       | 13.    | 247                      | 0.0988                   | 4.51                   |                            |
|       | 14.    | 240                      | 0.0960                   | 4.38                   |                            |
|       | 15.    | 237                      | 0.0948                   | 4.33                   |                            |
|       | 16.    | 246                      | 0.0984                   | 4.49                   |                            |
| WW    | 17.    | 256                      | 0.1024                   | 4.68                   | 32.64                      |

|     |     |        |      |       |
|-----|-----|--------|------|-------|
| 18. | 236 | 0.0944 | 4.31 | 30.09 |
| 19. | 252 | 0.1008 | 4.60 | 32.13 |
| 20. | 231 | 0.0924 | 4.22 | 29.45 |
| 21. | 256 | 0.1024 | 4.68 | 32.64 |
| 22. | 251 | 0.1004 | 4.59 | 32.00 |
| 23. | 278 | 0.1112 | 5.08 | 35.45 |
| 24. | 278 | 0.1112 | 5.08 | 35.45 |

**Further notes:**

Weight of warfarin: 137.02 mg

Observations:

WW group received warfarin and wheatgrass in separated dough.

**Table S5.** 3<sup>rd</sup> day of treatment

| Group | Animal | Weight of the animal (g) | Ammount of warfarin (mg) | Ammount of tablet (mg) | Ammount of wheatgrass (mg) |
|-------|--------|--------------------------|--------------------------|------------------------|----------------------------|
| WG    | 1.     | 257                      |                          |                        | 32.77                      |
|       | 2.     | 256                      |                          |                        | 32.64                      |
|       | 3.     | 248                      |                          |                        | 31.62                      |
|       | 4.     | 269                      |                          |                        | 34.30                      |
|       | 5.     | 256                      |                          |                        | 32.64                      |
|       | 6.     | 251                      |                          |                        | 32.00                      |
|       | 7.     | 260                      |                          |                        | 33.15                      |
|       | 8.     | 245                      |                          |                        | 31.24                      |
| WF    | 9.     | 269                      | 0.1076                   | 5.07                   |                            |
|       | 10.    | 269                      | 0.1076                   | 5.07                   |                            |
|       | 11.    | 247                      | 0.0988                   | 4.66                   |                            |
|       | 12.    | 269                      | 0.1076                   | 5.07                   |                            |

|    |     |     |        |      |       |
|----|-----|-----|--------|------|-------|
| WW | 13. | 255 | 0.1020 | 4.81 |       |
|    | 14. | 246 | 0.0984 | 4.64 |       |
|    | 15. | 237 | 0.0948 | 4.47 |       |
|    | 16. | 249 | 0.0996 | 4.70 |       |
|    | 17. | 258 | 0.1032 | 4.87 | 32.90 |
|    | 18. | 242 | 0.0968 | 4.56 | 30.86 |
|    | 19. | 252 | 0.1008 | 4.75 | 32.13 |
|    | 20. | 238 | 0.0952 | 4.49 | 30.35 |
|    | 21. | 262 | 0.1048 | 4.94 | 33.41 |
|    | 22. | 260 | 0.1040 | 4.90 | 33.15 |
|    | 23. | 289 | 0.1156 | 5.45 | 36.85 |
|    | 24. | 290 | 0.1160 | 5.47 | 36.98 |

**Further notes:**

Weight of warfarin: 141.45 mg

Observations: ---**Table S6.** 4<sup>th</sup> day of treatment

| Group | Animal | Weight of the animal (g) | Amount of warfarin (mg) | Amount of tablet (mg) | Amount of wheatgrass (mg) |
|-------|--------|--------------------------|-------------------------|-----------------------|---------------------------|
| WG    | 1.     | 262                      |                         |                       | 33.41                     |
|       | 2.     | 258                      |                         |                       | 32.90                     |
|       | 3.     | 256                      |                         |                       | 32.64                     |
|       | 4.     | 273                      |                         |                       | 34.81                     |
|       | 5.     | 260                      |                         |                       | 33.15                     |
|       | 6.     | 258                      |                         |                       | 32.90                     |
|       | 7.     | 259                      |                         |                       | 33.02                     |
|       | 8.     | 245                      |                         |                       | 31.24                     |

|    |     |     |        |      |       |
|----|-----|-----|--------|------|-------|
| WF | 9.  | 271 | 0.1084 | 5.15 |       |
|    | 10. | 269 | 0.1076 | 5.11 |       |
|    | 11. | 257 | 0.1028 | 4.89 |       |
|    | 12. | 270 | 0.1080 | 5.13 |       |
|    | 13. | 257 | 0.1028 | 4.89 |       |
|    | 14. | 245 | 0.0980 | 4.66 |       |
|    | 15. | 237 | 0.0948 | 4.51 |       |
|    | 16. | 249 | 0.0996 | 4.73 |       |
| WW | 17. | 263 | 0.1052 | 5.00 | 33.53 |
|    | 18. | 242 | 0.0968 | 4.60 | 30.86 |
|    | 19. | 261 | 0.1044 | 4.96 | 33.28 |
|    | 20. | 244 | 0.0976 | 4.64 | 31.11 |
|    | 21. | 270 | 0.1080 | 5.13 | 34.43 |
|    | 22. | 267 | 0.1068 | 5.08 | 34.04 |
|    | 23. | 285 | 0.1140 | 5.42 | 36.34 |
|    | 24. | 290 | 0.1160 | 5.51 | 36.98 |

**Further notes:**

Weight of warfarin: 142.61 mg

Observations: ---**Table S7.** 5<sup>th</sup> day of treatment

| Group | Animal | Weight of the animal (g) | Ammount of warfarin (mg) | Ammount of tablet (mg) | Ammount of wheatgrass (mg) |
|-------|--------|--------------------------|--------------------------|------------------------|----------------------------|
| WG    | 1.     | 265                      |                          |                        | 33.79                      |
|       | 2.     | 269                      |                          |                        | 34.30                      |
|       | 3.     | 261                      |                          |                        | 33.28                      |



|    |     |     |        |      |       |
|----|-----|-----|--------|------|-------|
| WF | 4.  | 276 |        |      | 35.19 |
|    | 5.  | 262 |        |      | 33.41 |
|    | 6.  | 261 |        |      | 33.28 |
|    | 7.  | 261 |        |      | 33.28 |
|    | 8.  | 249 |        |      | 31.75 |
|    | 9.  | 279 | 0.1116 | 5.14 |       |
|    | 10. | 272 | 0.1088 | 5.02 |       |
|    | 11. | 262 | 0.1048 | 4.83 |       |
|    | 12. | 279 | 0.1116 | 5.14 |       |
|    | 13. | 267 | 0.1068 | 4.92 |       |
| WW | 14. | 252 | 0.1008 | 4.65 |       |
|    | 15. | 245 | 0.0980 | 4.52 |       |
|    | 16. | 255 | 0.1020 | 4.70 |       |
|    | 17. | 275 | 0.1100 | 5.07 | 35.06 |
|    | 18. | 248 | 0.0992 | 4.57 | 31.62 |
|    | 19. | 263 | 0.1052 | 4.85 | 33.53 |
|    | 20. | 246 | 0.0984 | 4.54 | 31.37 |
|    | 21. | 275 | 0.1100 | 5.07 | 35.06 |
|    | 22. | 267 | 0.1068 | 4.92 | 34.04 |
|    | 23. | 299 | 0.1196 | 5.51 | 38.12 |
|    | 24. | 303 | 0.1212 | 5.59 | 38.63 |

**Further notes:**

Weight of warfarin: 138.3 mg

Observations: ---

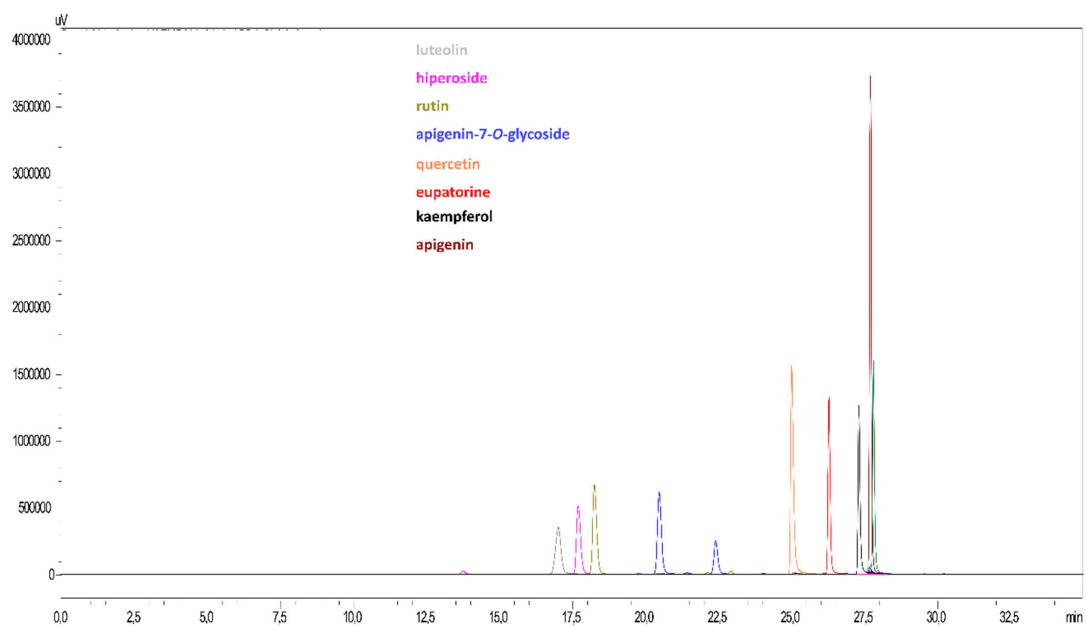

**Figure S1.** HPLC chromatogram of reference compounds ( $\lambda=350$  nm).

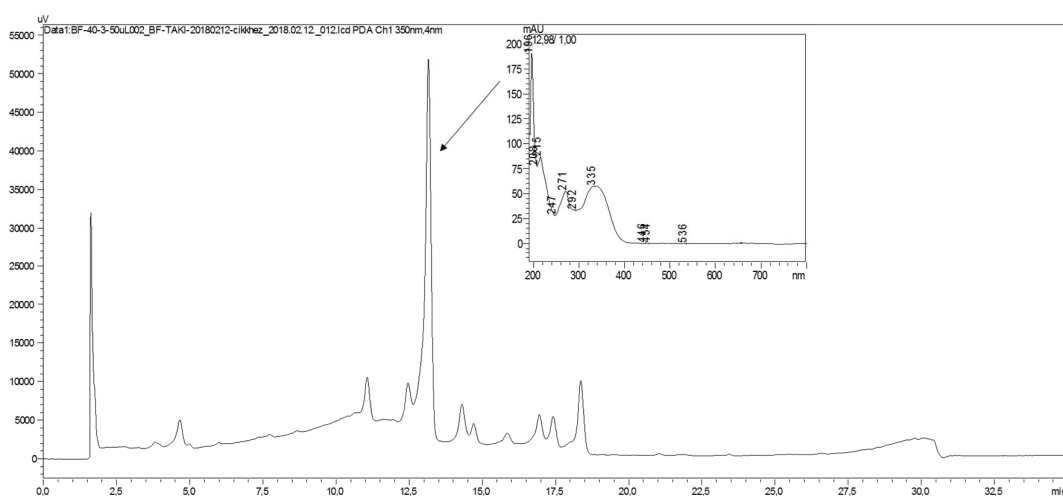

**Figure S2.** HPLC chromatogram of fraction eluted with 40% of methanol ( $\lambda=350$  nm) and the UV spectrum of the major peak at  $R_t = 13$  min.

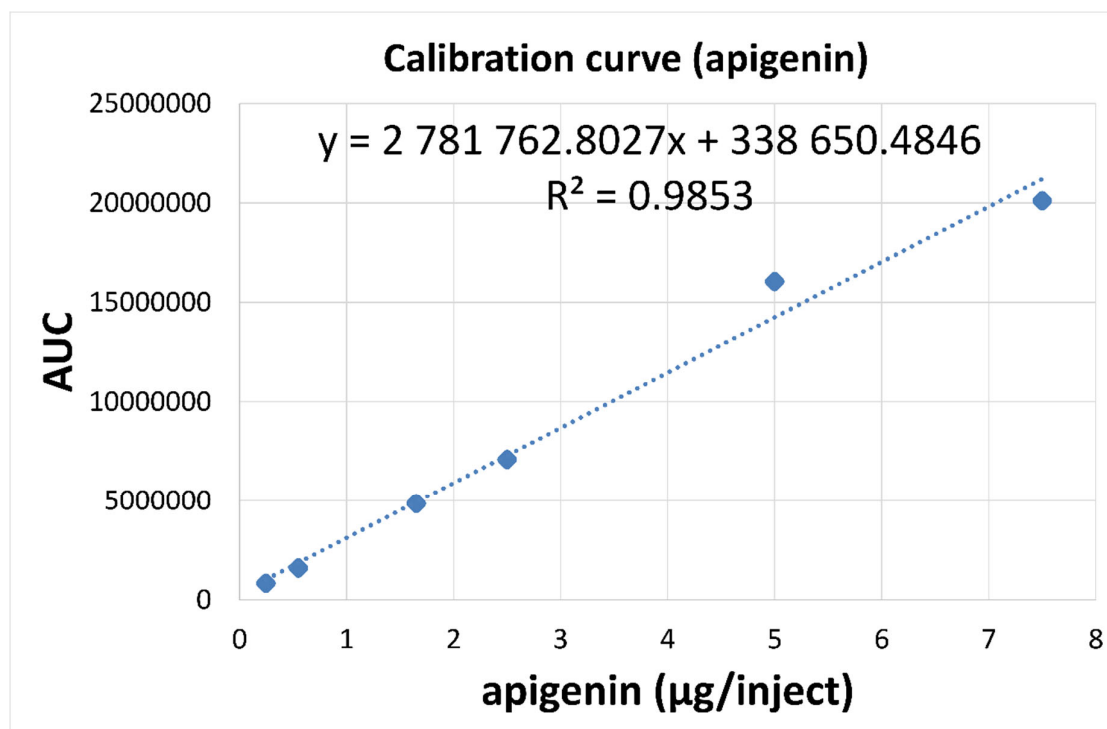

**Figure S3.** Calibration curve (apigenin).
